# Supplementary material for: Pressor response to angiotensin II is enhanced in aged mice and associated with inflammation, vasoconstriction and oxidative stress
Source: PubMed Central journal article supplement (PMC5509458; doi:10.18632/aging.101255), 2017-06-28
Supplement: aging-09-1595-s001.pdf [file aging-09-1595-s001.pdf]

## SUPPLEMENTARY MATERIALS

### Supplemental Figures

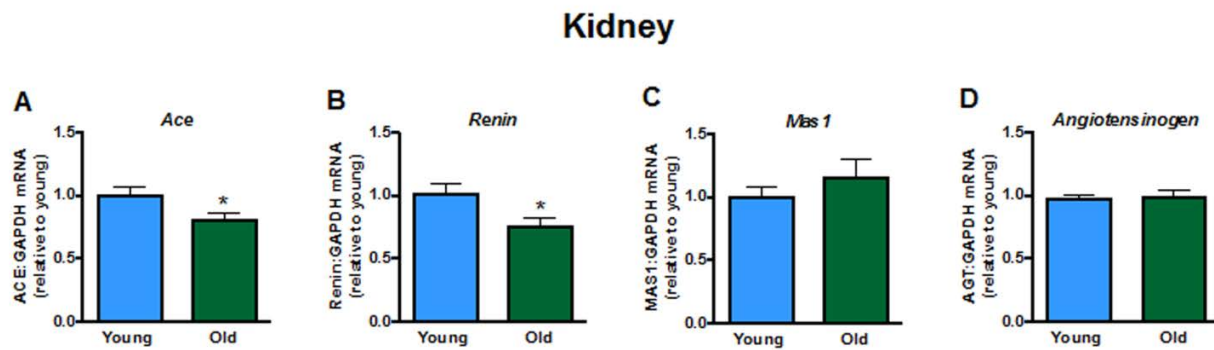

**Supplementary Figure 1.** Renal mRNA expression of **A:** angiotensin converting enzyme (*Ace*), **B:** *Renin*, **C:** mas receptor 1 (*Mas1*) and **D:** *Angiotensinogen*. All data are mean  $\pm$  S.E.M. \* $P < 0.05$  vs young, Student's unpaired t-test.
